# Supplementary material for: A novel two-dimensional mixed molybdenum–vanadium polyoxometalate with two types of cobalt(ii) complex fragments as bridgesElectronic supplementary information (ESI) available: synthesis and characterization of 1. Fig. S1: view of layers down the a axis of 1. Fig. S2: plots of χT and χ–1 vs. T for 1. See http://www.rsc.org/suppdata/cc/b2/b202540j/
Source: Royal Society of Chemistry journal article supplement (doi:10.1039/b202540j), 2002-05-31
Supplement: b202540j2.doc [file b202540j2.doc]

Fig. S2. Plots of T (□) and --1 (○) versus T for 1.

Supplementary Material (ESI) for Chemical Communications
This journal is © The Royal Society of Chemistry 2002
