# Supplementary material for: A novel two-dimensional mixed molybdenum–vanadium polyoxometalate with two types of cobalt(ii) complex fragments as bridgesElectronic supplementary information (ESI) available: synthesis and characterization of 1. Fig. S1: view of layers down the a axis of 1. Fig. S2: plots of χT and χ–1 vs. T for 1. See http://www.rsc.org/suppdata/cc/b2/b202540j/
Source: Royal Society of Chemistry journal article supplement (doi:10.1039/b202540j), 2002-05-31
Supplement: b202540j3.doc [file b202540j3.doc]

Supplementary Material (ESI) for Chemical Communications

This journal is © The Royal Society of Chemistry 2002

Typical procedure for synthesis of **1**: A mixture of NH4VO3 (3.0 mmol), H3[P(Mo3O10)4]× xH2O (0.5 mmol), Co(en)3Cl3(1.0 mmol), 2,2’-bipyridine(1.0mmol) and H2O(18ml) was stirred over 20 min, and then transferred into a 25ml Teflon-lined steel autoclave. The mixture was heated at 170 °C for 6 days, 530 mg dark block crystals of **1** were separated from the blue mother solution. IR (KBr pellet, cm-1): 3435(b, s), 3217(b,s), 3082(m), 1599(m), 1566(w), 1473(w), 1443(m), 1315(w), 1249(w), 1160(w), 1056(w), 1023(w), 951(vs), 769(s), 712(s), 651(m). XPS (eV): Co2p3 /2(781.3), V2p3/2 (516.5) and Mo3d5/2 (231.9).
